# Supplementary material for: Bio-based solvents as a sustainable alternative to develop a multiproduct biorefinery process from archaebacteria Halobacterium salinarum R1
Source: Royal Society of Chemistry journal article supplement (doi:10.1039/d3gc03870j), 2024-01-01
Supplement: d3gc03870j1.pdf [file d3gc03870j1.pdf]

**SUPPLEMENTARY MATERIAL**

**Bio-based solvents as a sustainable alternative to develop a multiproduct biorefinery  
process from archaeobacteria *Halobacterium salinarum* R1**

Mariam **Kholany**,<sup>a</sup> Inês P. E. **Macário**,<sup>a,b</sup> Telma **Veloso**,<sup>a,b</sup> Leticia S. **Contieri**,<sup>a,c</sup> Bárbara M.  
C. **Vaz**,<sup>a</sup> Joana L. **Pereira**,<sup>b</sup> Claudia **Nunes**,<sup>a</sup> João A. P. **Coutinho**,<sup>a</sup> Maurício A. **Rostagno**,<sup>c\*</sup>  
Sónia P. M. **Ventura**,<sup>a\*</sup> Leonardo M. **de Souza Mesquita**<sup>c\*</sup>

<sup>a</sup> CICECO – Aveiro Institute of Materials, Department of Chemistry, University of Aveiro,  
Campus Universitário de Santiago, 3810-193 Aveiro, Portugal.

<sup>b</sup> Department of Biology & CESAM, University of Aveiro, 3810-193 Aveiro, Portugal

<sup>c</sup> Multidisciplinary Laboratory of Food and Health (LabMAS), School of Applied Sciences  
(FCA), University of Campinas, Rua Pedro Zaccaria 1300, 13484, Brazil.

\* Corresponding author: L.M. de Souza Mesquita - mesquitals@gmail.com; M. A.  
Rostagno - mauricio.rostagno@fca.unicamp.br; S.P.M. Ventura – spventura@ua.pt

**Tables**

**Table S1.** Real and coded values and experimental values of the CCRD (2<sup>3</sup>) for total carotenoids content (yield -  $\mu\text{g}_{\text{carotenoids}} \cdot \text{g}_{\text{biomass}}^{-1}$ ) extracted by gamma-valerolactone (GVL) aqueous solution.

| Assay | [GVL] – mM   | RSL – $\text{g}_{\text{biomass}} \cdot \text{mL}_{\text{solvent}}^{-1}$ | pH           | Yield ( $\mu\text{g}_{\text{carotenoids}} \cdot \text{g}_{\text{biomass}}^{-1}$ ) |
|-------|--------------|-------------------------------------------------------------------------|--------------|-----------------------------------------------------------------------------------|
|       | $X_1$        | $X_2$                                                                   | $X_3$        | Y                                                                                 |
| 1     | 80 (-1)      | 0.05 (-1)                                                               | 4 (-1)       | 223.9                                                                             |
| 2     | 220 (1)      | 0.05 (-1)                                                               | 4 (-1)       | 56.0                                                                              |
| 3     | 80 (-1)      | 0.15 (1)                                                                | 4 (-1)       | 130.6                                                                             |
| 4     | 220 (1)      | 0.15 (1)                                                                | 4 (-1)       | 31.1                                                                              |
| 5     | 80 (-1)      | 0.05 (-1)                                                               | 10 (1)       | 246.3                                                                             |
| 6     | 220 (1)      | 0.05 (-1)                                                               | 10 (1)       | 28.0                                                                              |
| 7     | 80 (-1)      | 0.15 (1)                                                                | 10 (1)       | 82.1                                                                              |
| 8     | 220 (1)      | 0.15 (1)                                                                | 10 (1)       | 20.5                                                                              |
| 9     | 32.4 (-1.68) | 0.1 (0)                                                                 | 7 (0)        | 28.0                                                                              |
| 10    | 267.6 (1.68) | 0.1 (0)                                                                 | 7 (0)        | 114.8                                                                             |
| 11    | 150 (0)      | 0.016 (-1.68)                                                           | 7 (0)        | 291.6                                                                             |
| 12    | 150 (0)      | 0.184 (1.68)                                                            | 7 (0)        | 735.3                                                                             |
| 13    | 150 (0)      | 0.1 (0)                                                                 | 1.96 (-1.68) | 14.9                                                                              |
| 14    | 150 (0)      | 0.1 (0)                                                                 | 12.04 (1.68) | 18.7                                                                              |
| 15    | 150 (0)      | 0.1 (0)                                                                 | 7 (0)        | 550.5                                                                             |
| 16    | 150 (0)      | 0.1 (0)                                                                 | 7 (0)        | 541.1                                                                             |
| 17    | 150 (0)      | 0.1 (0)                                                                 | 7 (0)        | 550.5                                                                             |
| 18    | 150 (0)      | 0.1 (0)                                                                 | 7 (0)        | 549.5                                                                             |
| 19    | 150 (0)      | 0.1 (0)                                                                 | 7 (0)        | 547.7                                                                             |
| 20    | 150 (0)      | 0.1 (0)                                                                 | 7 (0)        | 550.5                                                                             |

**Table S2.** Price of the materials used in the biorefinery approach developed used on the calculation of production costs *per* batch of biomass (8.4 g).

| Steps | Required reagents/ batch <sup>a</sup> | Cost/batch (US\$) |
|-------|---------------------------------------|-------------------|
|-------|---------------------------------------|-------------------|

|                                                |                                                  |               |
|------------------------------------------------|--------------------------------------------------|---------------|
| Step I (Cultivation of <i>H. salinarum</i> R1) | NaCl                                             | 12.99         |
|                                                | MgSO <sub>4</sub> ·7H <sub>2</sub> O             | 4.71          |
|                                                | KCl                                              | 0.65          |
|                                                | Na citrate                                       | 6.22          |
|                                                | CaCl <sub>2</sub>                                | 0.03          |
|                                                | Tryptone                                         | 6.05          |
|                                                | Yeast extract                                    | 0.25          |
|                                                | Glycerol                                         | 0.01          |
|                                                | Energy (autoclave + incubators + centrifugation) | 32.59         |
|                                                | <b>Total cost step I (reagents + energy)</b>     | <b>63.49</b>  |
| Step II (Solid-liquid extraction)              | Water                                            | 0.30          |
|                                                | GVL                                              | 0.43          |
|                                                | Energy (trayster + centrifugation)               | 0.06          |
|                                                | <b>Total cost step II (reagents + energy)</b>    | <b>0.78</b>   |
| Step III (Precipitation/purification)          | EtOH                                             | 8.69          |
|                                                | PBS                                              | 11.60         |
|                                                | Energy (centrifugation + refrigeration)          | 0.96          |
|                                                | <b>Total cost step III (reagents + energy)</b>   | <b>21.25</b>  |
| Step IV (Polishing)                            | Ultrafiltration tubes <sup>b</sup>               | 16.5          |
|                                                | Energy (centrifugation + rotatory evaporation)   | 0.36          |
|                                                | <b>Total cost step IV (reagents + energy)</b>    | <b>16.86</b>  |
| <b>TOTAL COST OF THE BIOREFINERY APPROACH</b>  |                                                  | <b>102.39</b> |

<sup>a</sup>prices of each reagent were sourced from the Sigma-Aldrich website.; <sup>b</sup>recycled 10-times; GVL: gamma-valerolactone; PBS: phosphate buffer solution (pH 7); EtOH: ethanol.

**Table S3.** Comprehensive cost breakdown for the biorefinery approach concerning three possible scenarios

| Scenarios | Steps performed in each scenario | Products obtained                                    | Production cost (US\$) | Return (US\$) |
|-----------|----------------------------------|------------------------------------------------------|------------------------|---------------|
| 1         | I and II                         | Mixture of carotenoids, proteins and polysaccharides | 64.28                  | 546.01        |
| 2         | I, II, and III                   | Purified carotenoids, proteins, and polysaccharides  | 85.53                  | 802.79        |
| 3 cycle 1 | I, III, III, and IV              | Purified carotenoids, proteins, and polysaccharides  | 87.54                  | 785.93        |
| 3 cycle 2 | I, III, III, and IV              | Purified carotenoids, proteins, and polysaccharides  | 78.85                  | 1571.79       |
| 3 cycle 3 | I, III, III, and IV              | Purified carotenoids, proteins, and polysaccharides  | 78.18                  | 2357.79       |
| 3 cycle 4 | I, III, III, and IV              | Purified carotenoids, proteins, and polysaccharides  | 78.13                  | 3143.72       |
| 3 cycle 5 | I, III, III, and IV              | Purified carotenoids, proteins, and polysaccharides  | 78.13                  | 3929.65       |
| 3 cycle 6 | I, III, III, and IV              | Purified carotenoids, proteins, and polysaccharides  | 78.13                  | 4715.58       |
| 3 cycle 7 | I, III, III, and IV              | Purified carotenoids, proteins, and polysaccharides  | 78.13                  | 5501.52       |

|            |                     |                                                     |       |         |
|------------|---------------------|-----------------------------------------------------|-------|---------|
| 3 cycle 8  | I, III, III, and IV | Purified carotenoids, proteins, and polysaccharides | 78.13 | 6287.45 |
| 3 cycle 9  | I, III, III, and IV | Purified carotenoids, proteins, and polysaccharides | 78.13 | 7073.38 |
| 3 cycle 10 | I, III, III, and IV | Purified carotenoids, proteins, and polysaccharides | 78.13 | 7859.31 |

## Figures

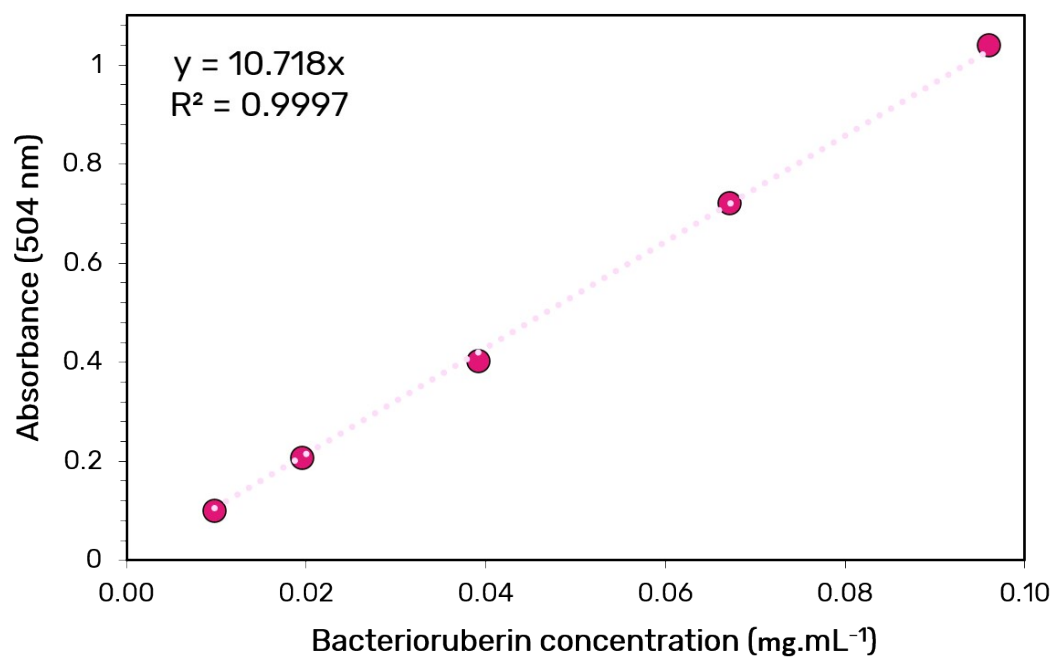

**Figure S1.** Calibration curve of bacterioruberin performed in UV-vis (204 nm), solvent aqueous solution of Tween 20 (250 mM).

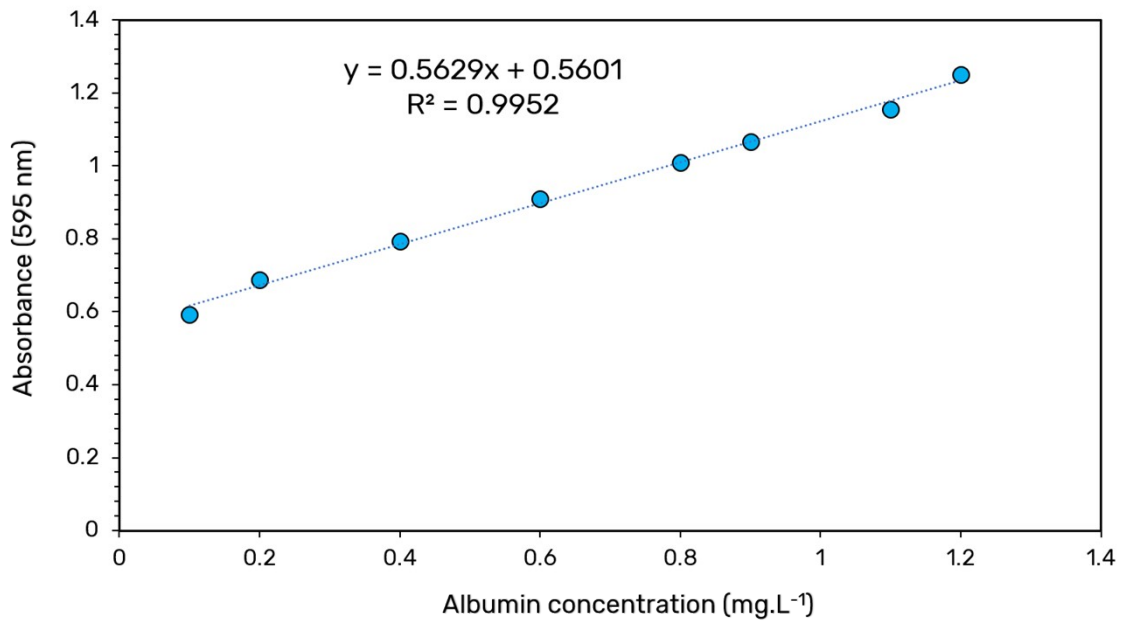

**Figure S2.** Calibration curve of bovine serum albumin performed in UV-vis (595 nm) for Bradford analysis.

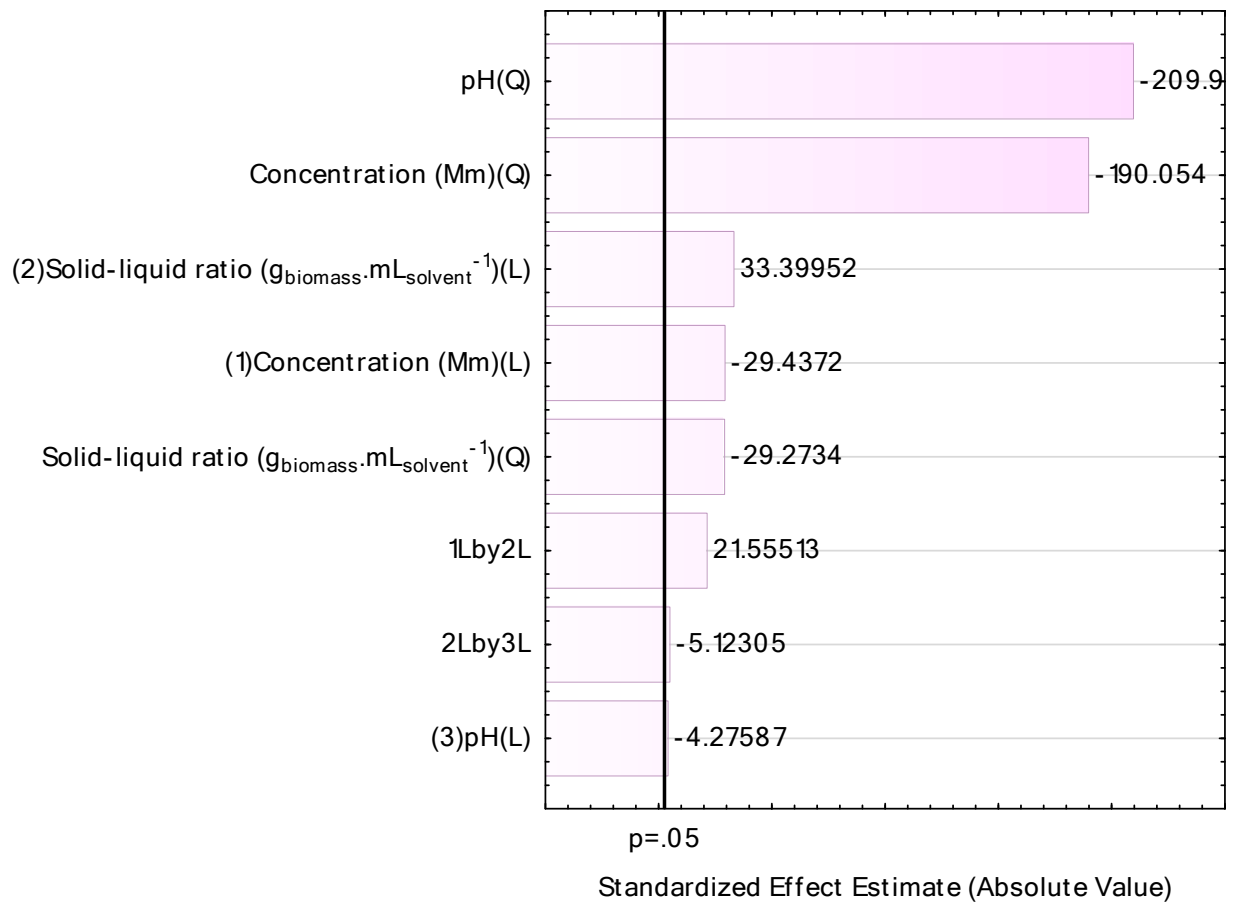

**Fig. S3.** Pareto Chart of the CCRD (2<sup>3</sup> + axial points) regarding the yield of extraction of carotenoids from *H. salinarum* R1 using an aqueous solution of GVL.

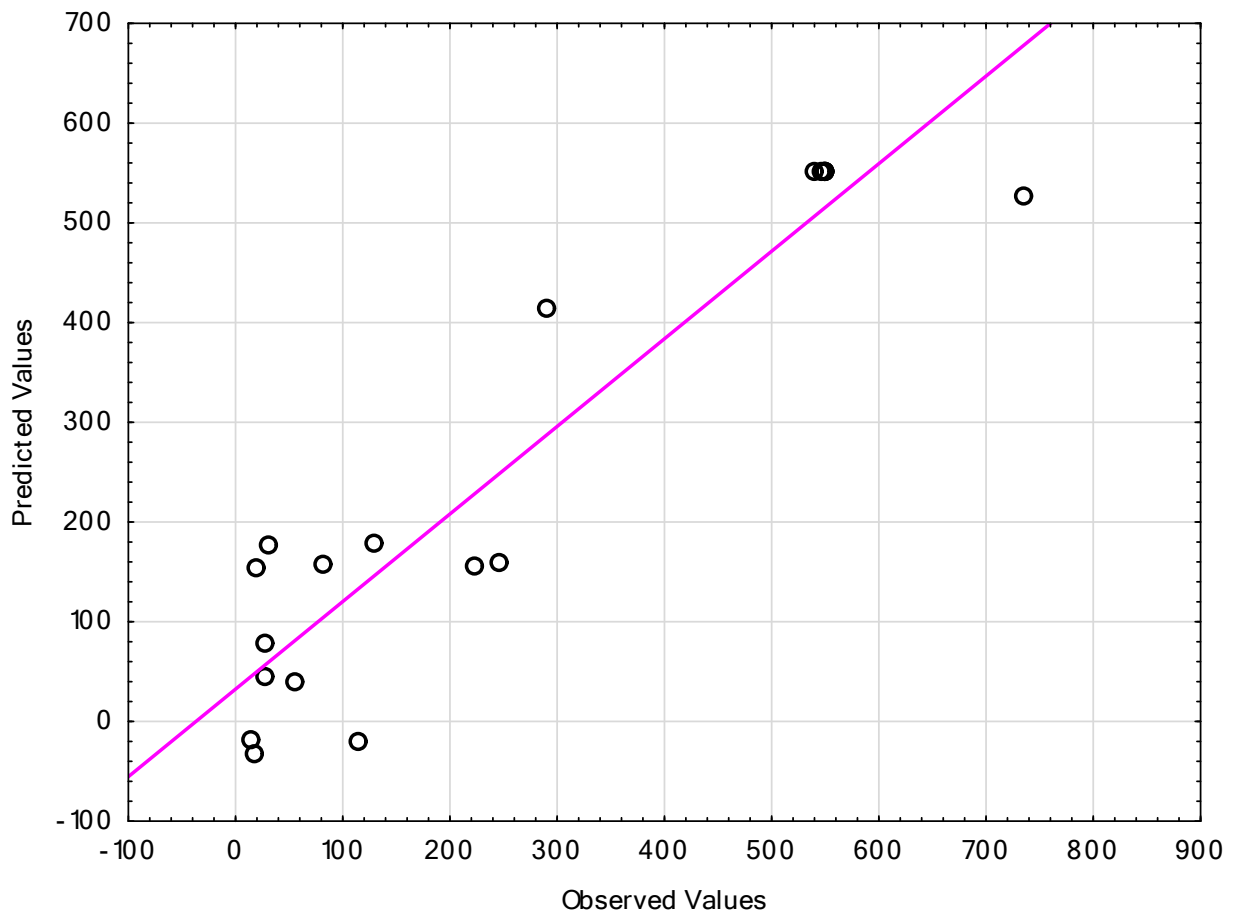

**Fig. S4.** Graphical representation of the predicted vs experimental values by the model when GVL was used as solvent in the extraction of carotenoids from *H. salinarum* R1.

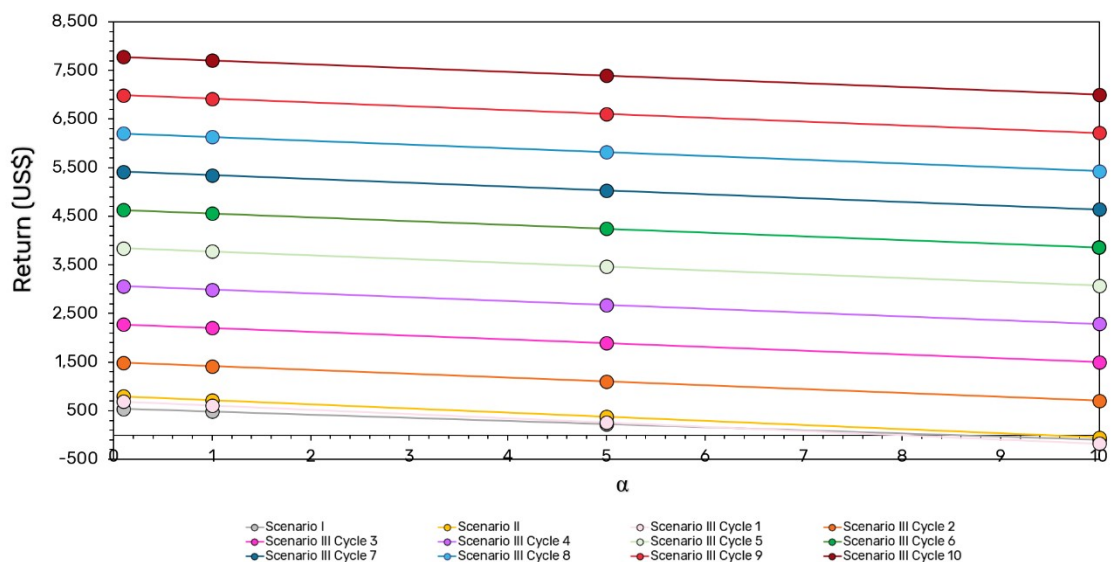

**Fig. S5.** Return analysis expressed as US\$/batch, of the extraction of carotenoids, proteins and polysaccharides considering different market prices and  $\alpha$  scenarios ( $\alpha = 0.1, 1, 5, \text{ or } 10$ ) along the different commercial scenarios.
